# Supplementary figures and images for: Annual net primary productivity of a cyanobacteria dominated biological soil crust in the Gulf savanna, Queensland, Australia
Source: Copernicus journal article supplement (doi:10.5194/bg-2017-374), 2017-09-15

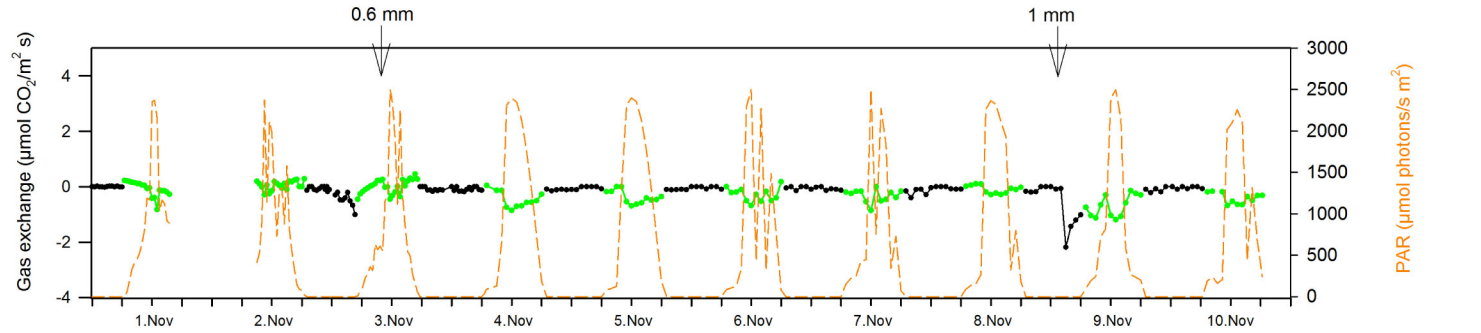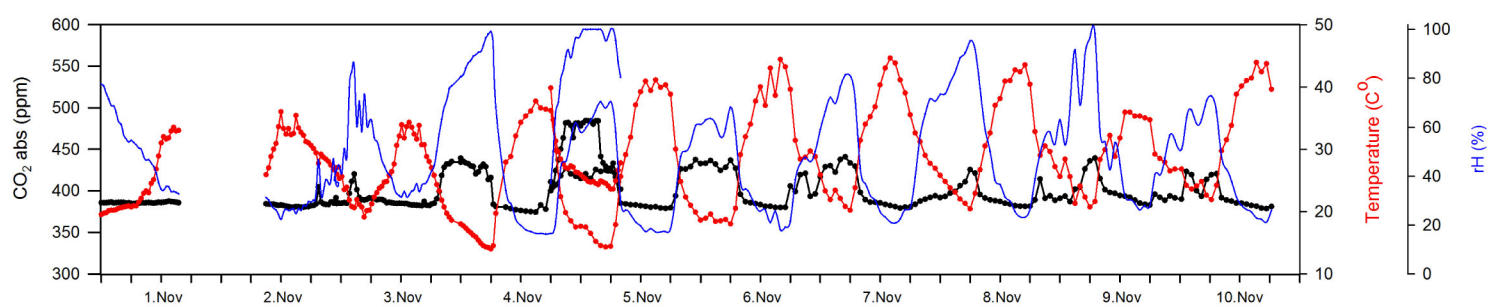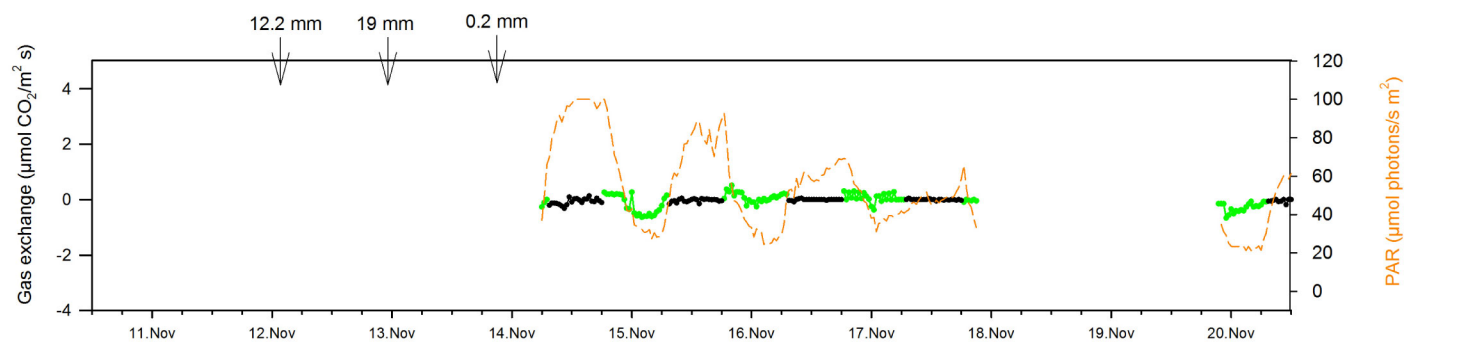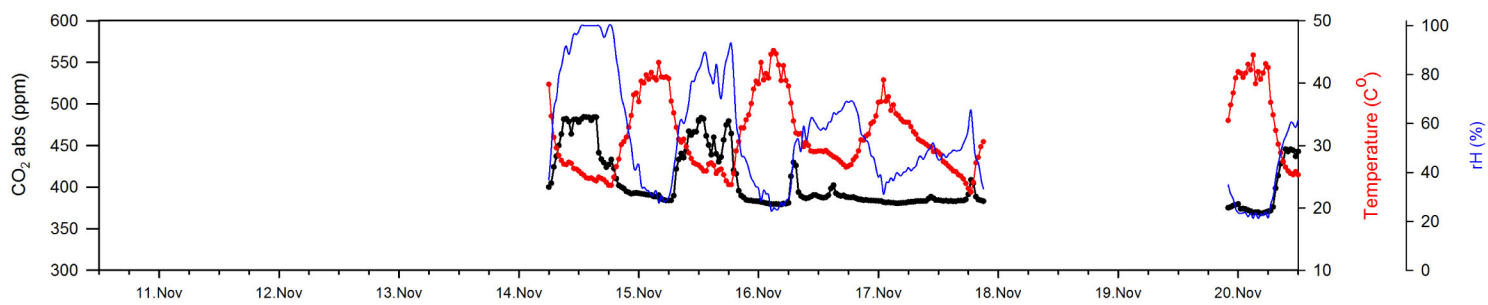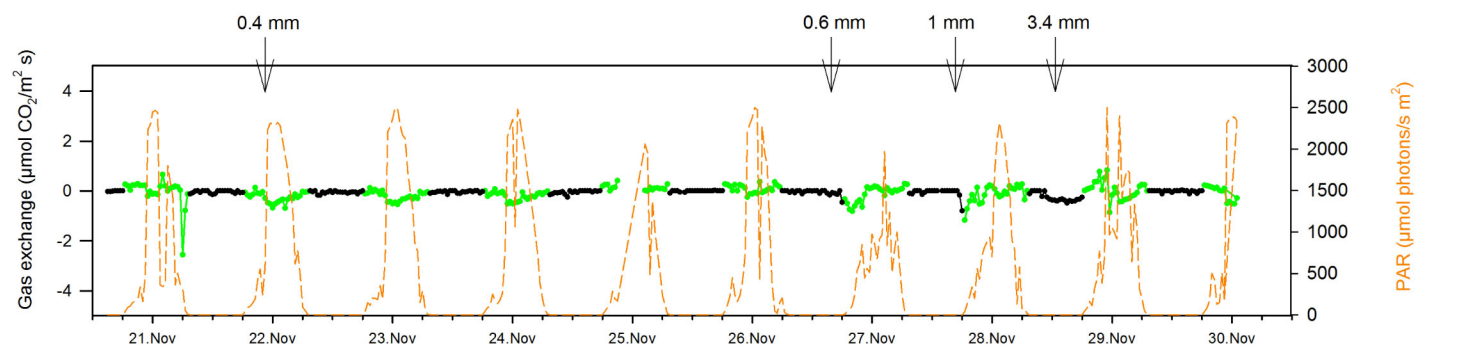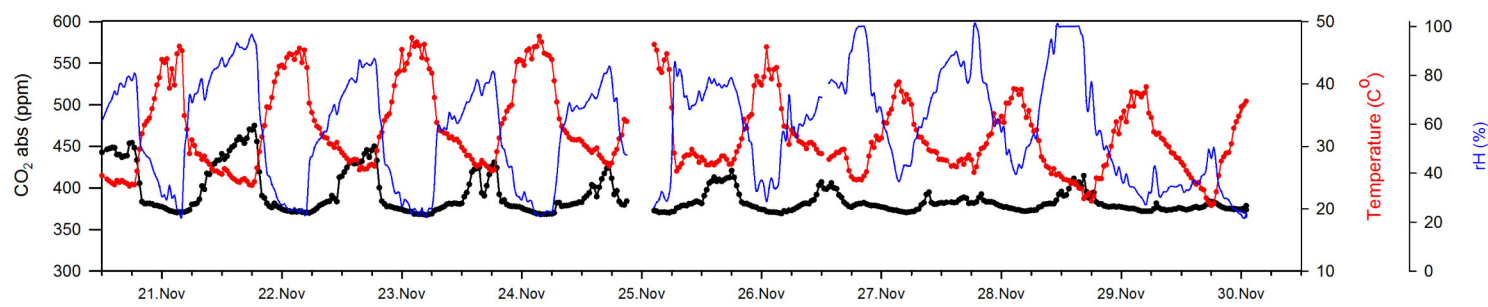

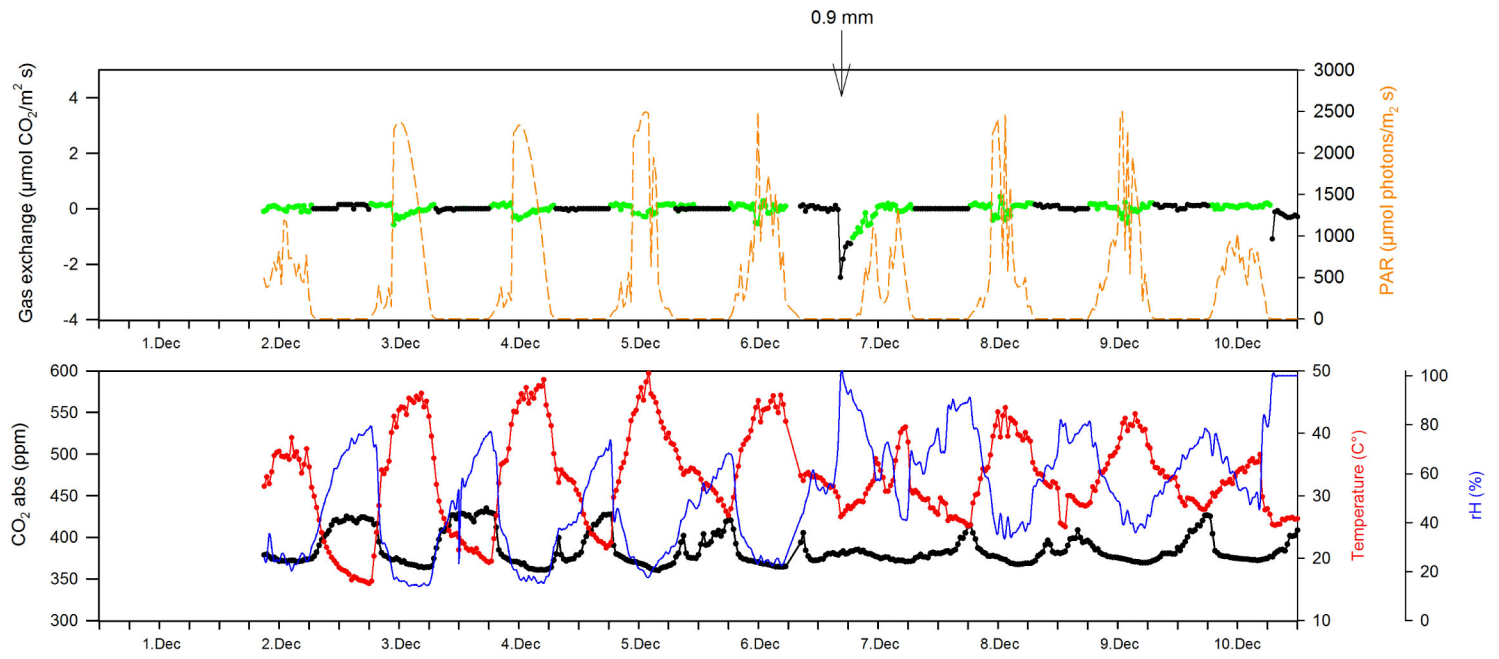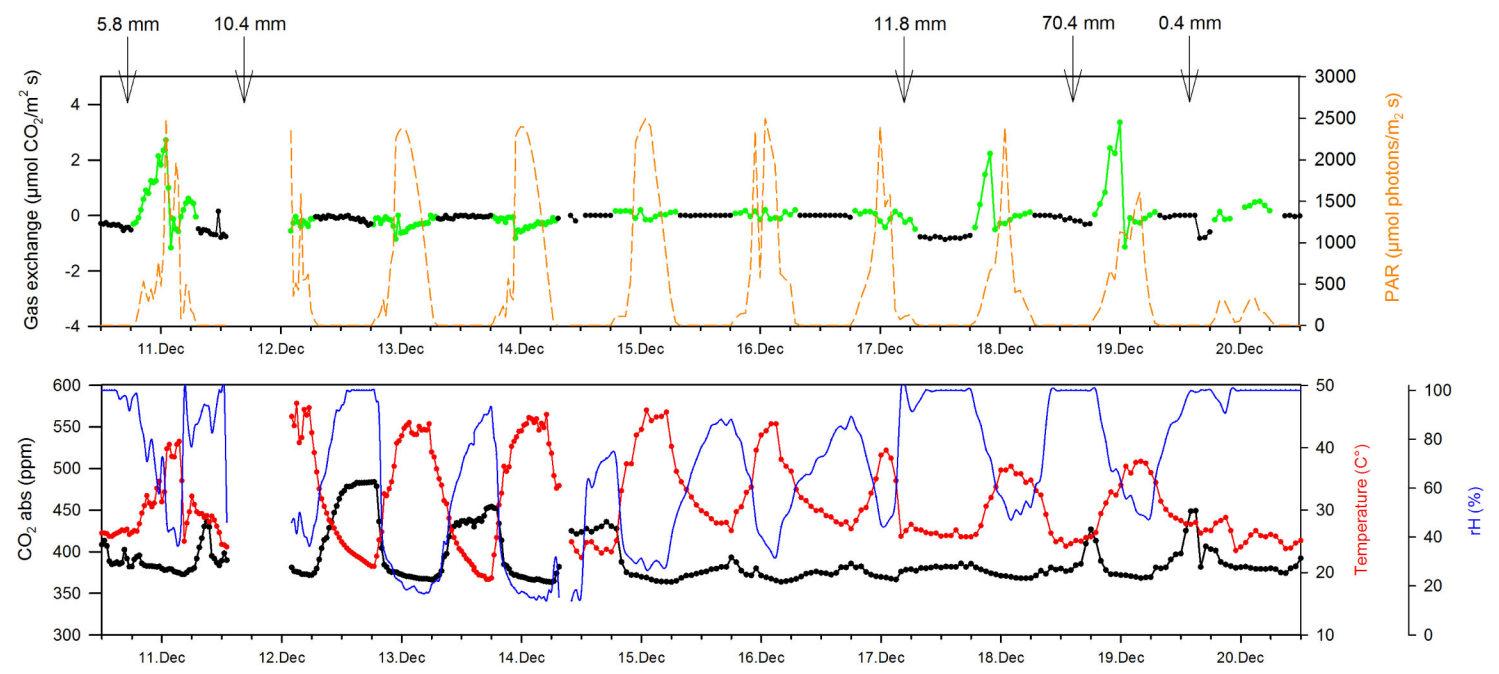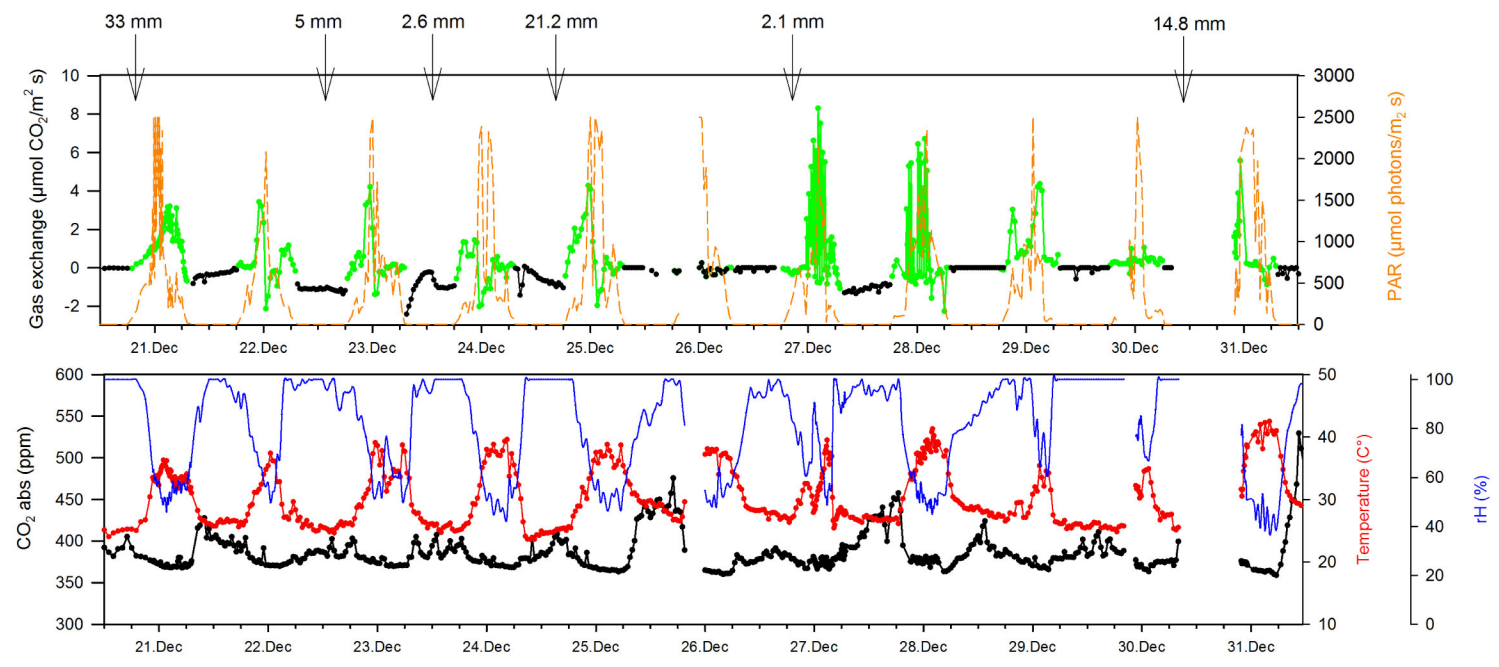

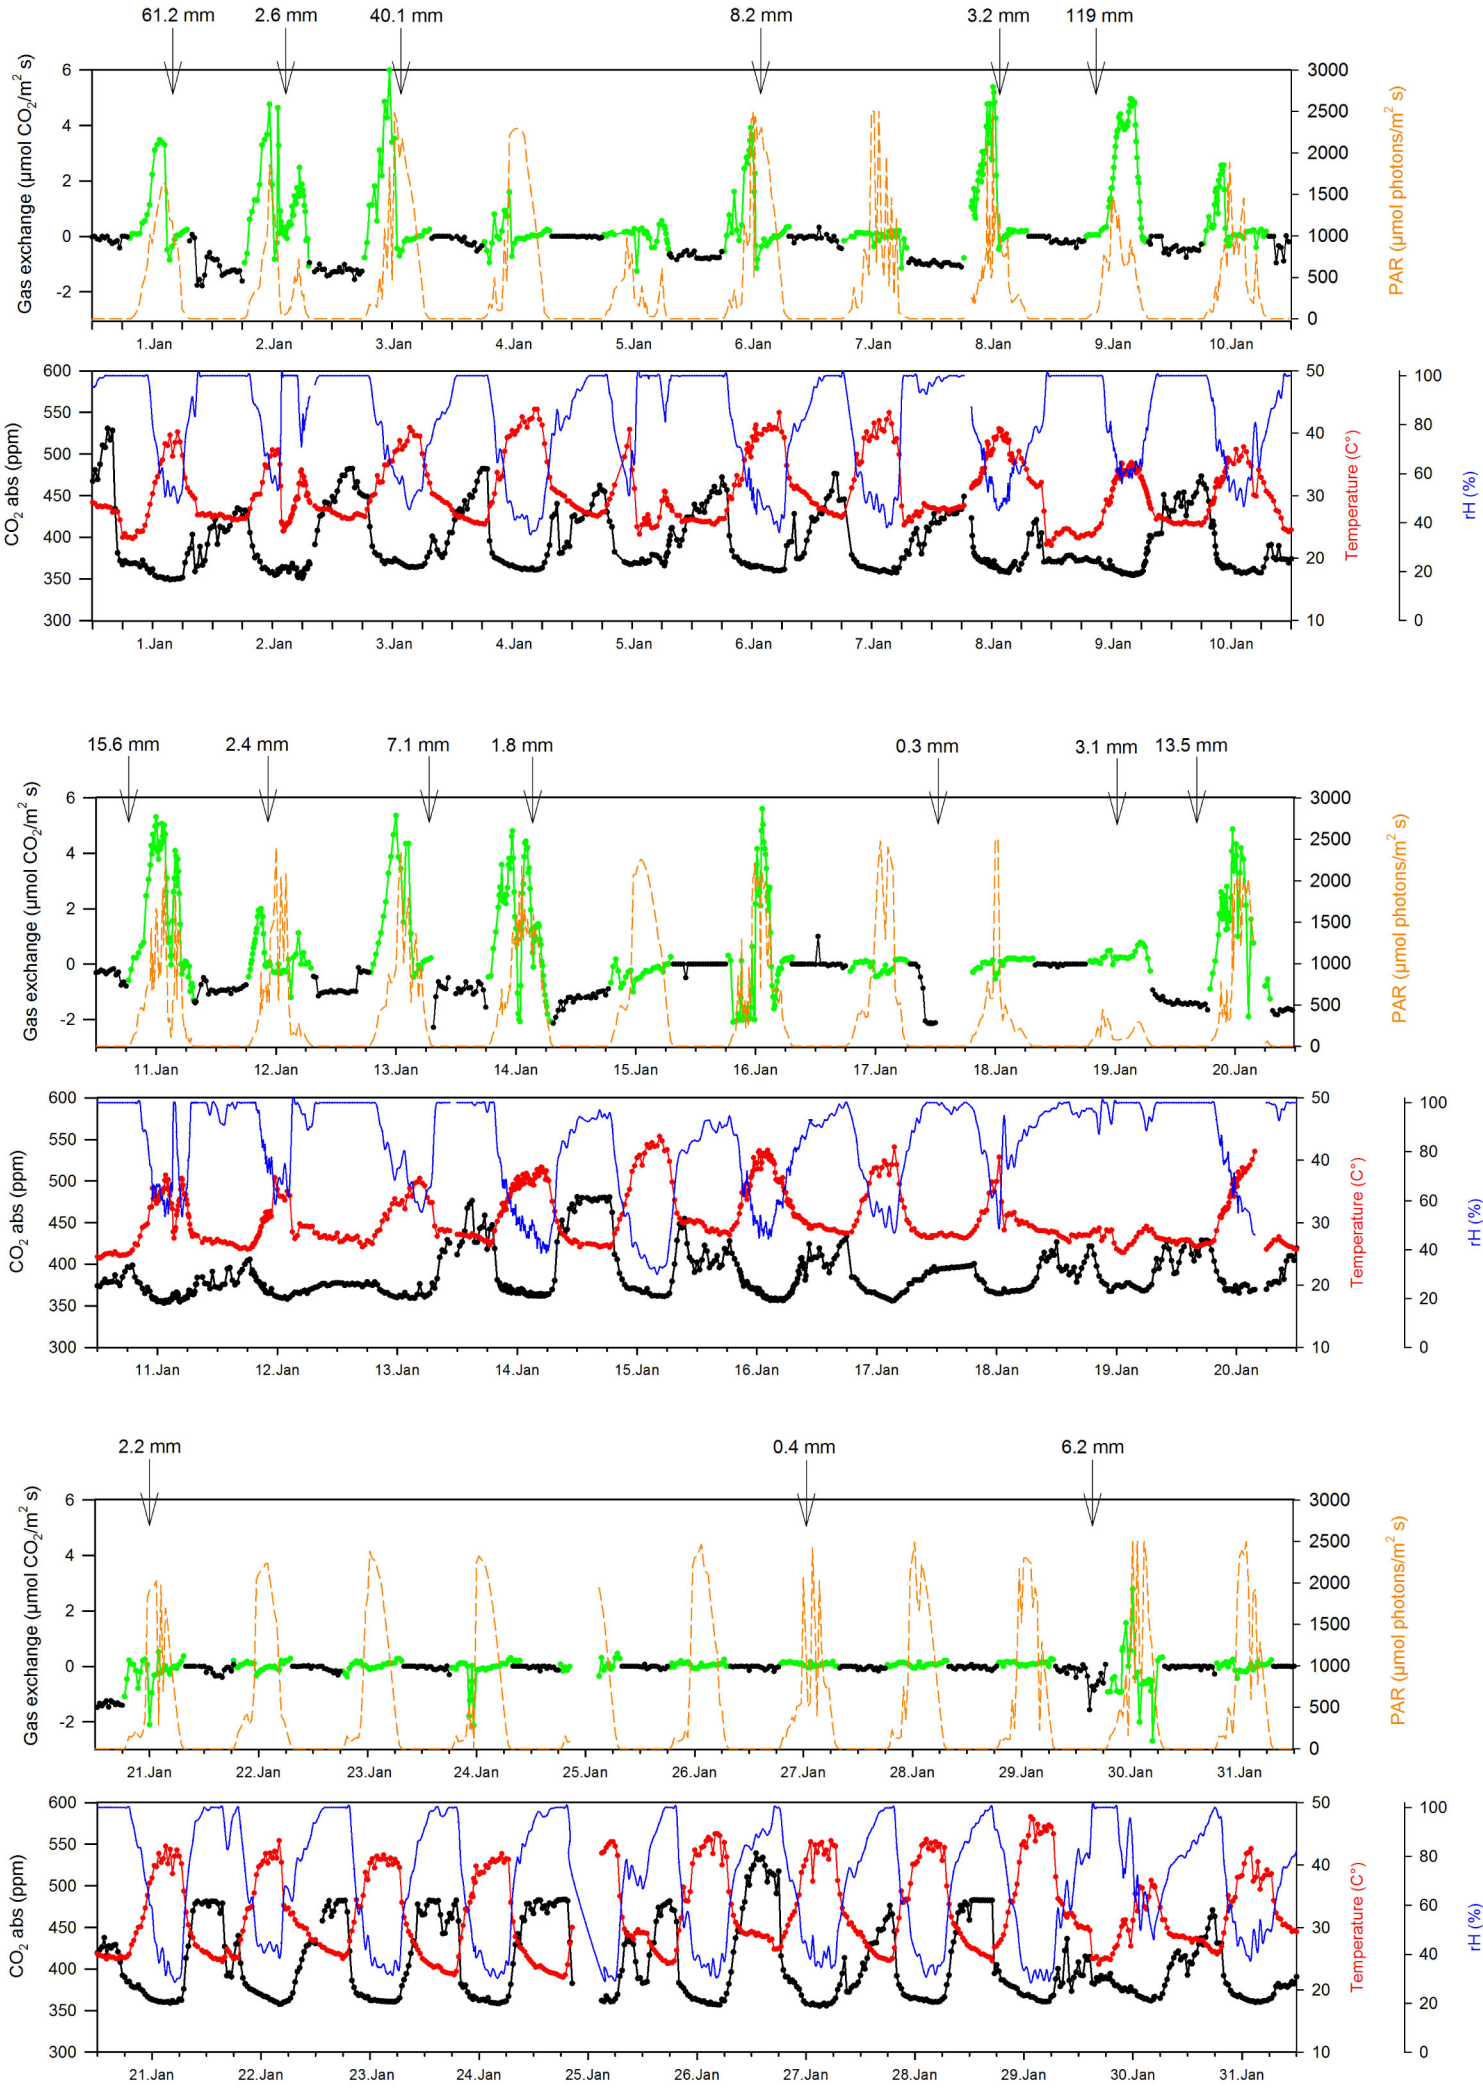



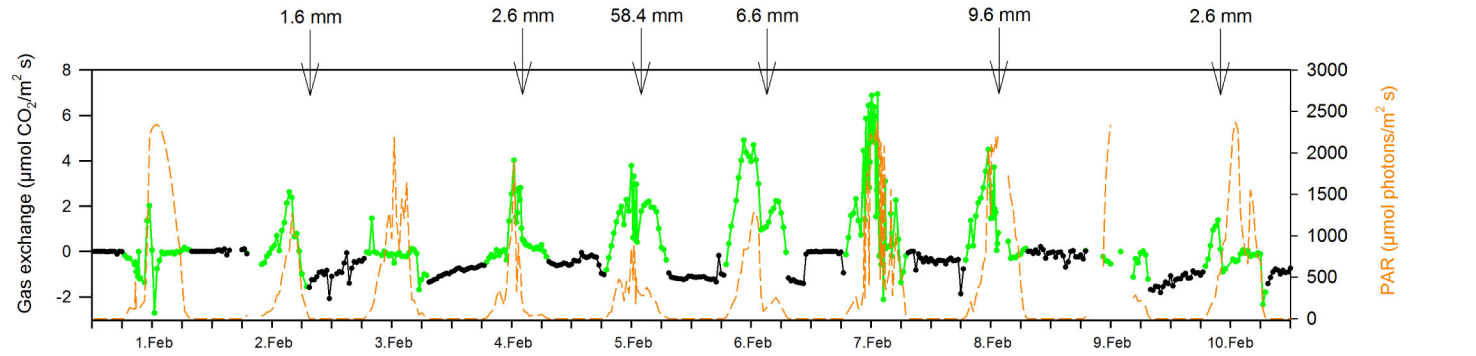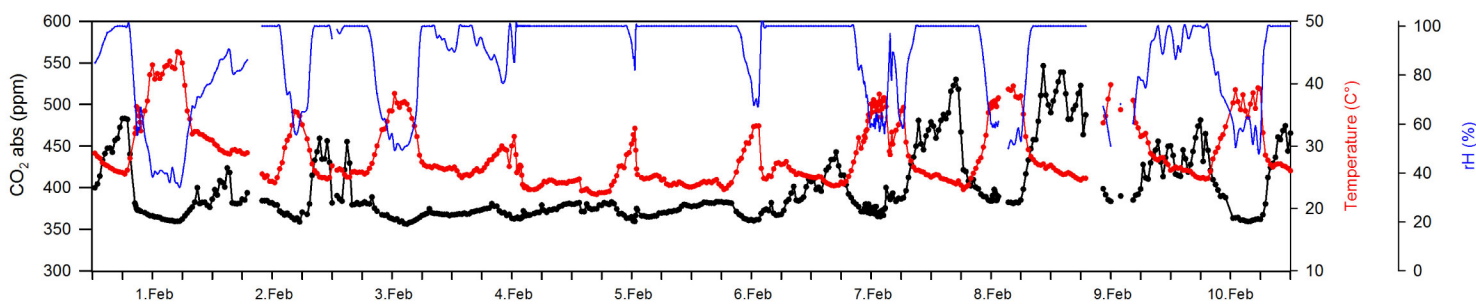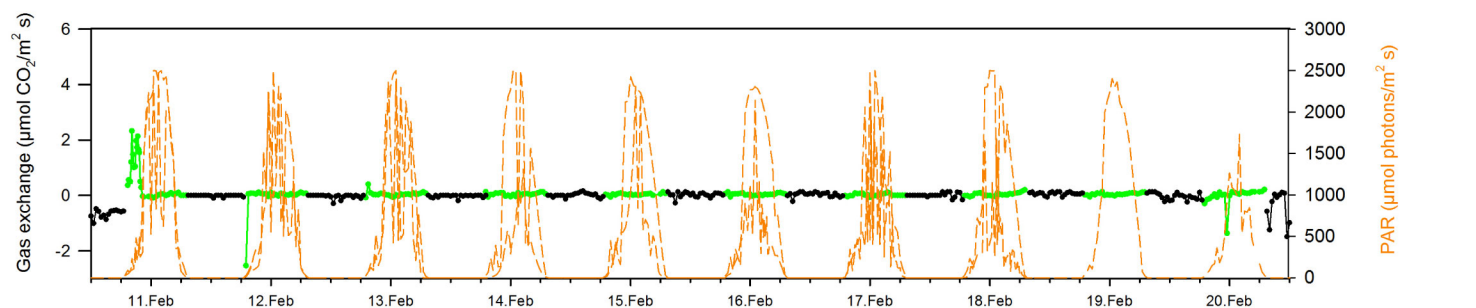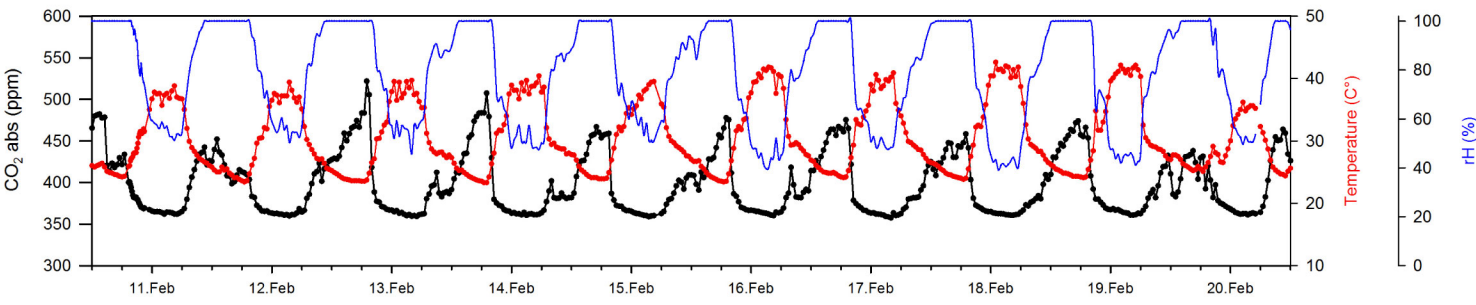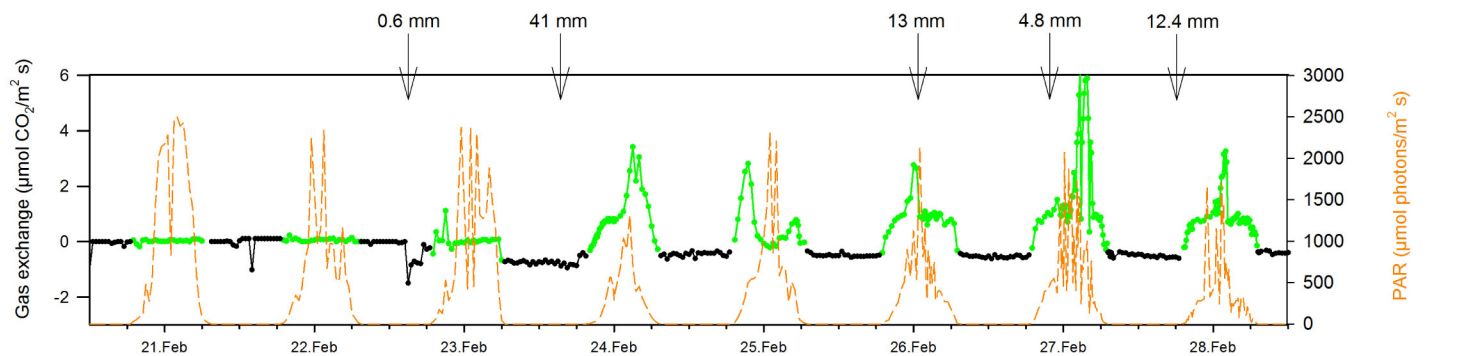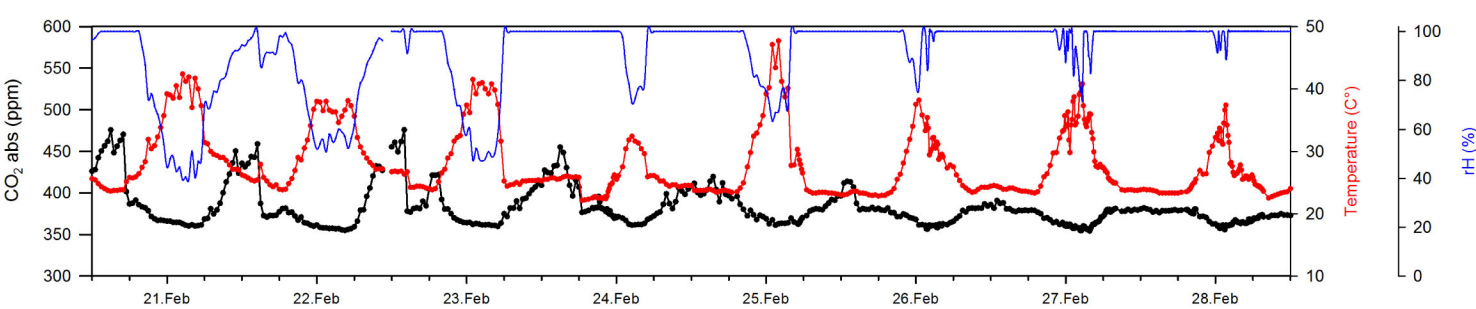

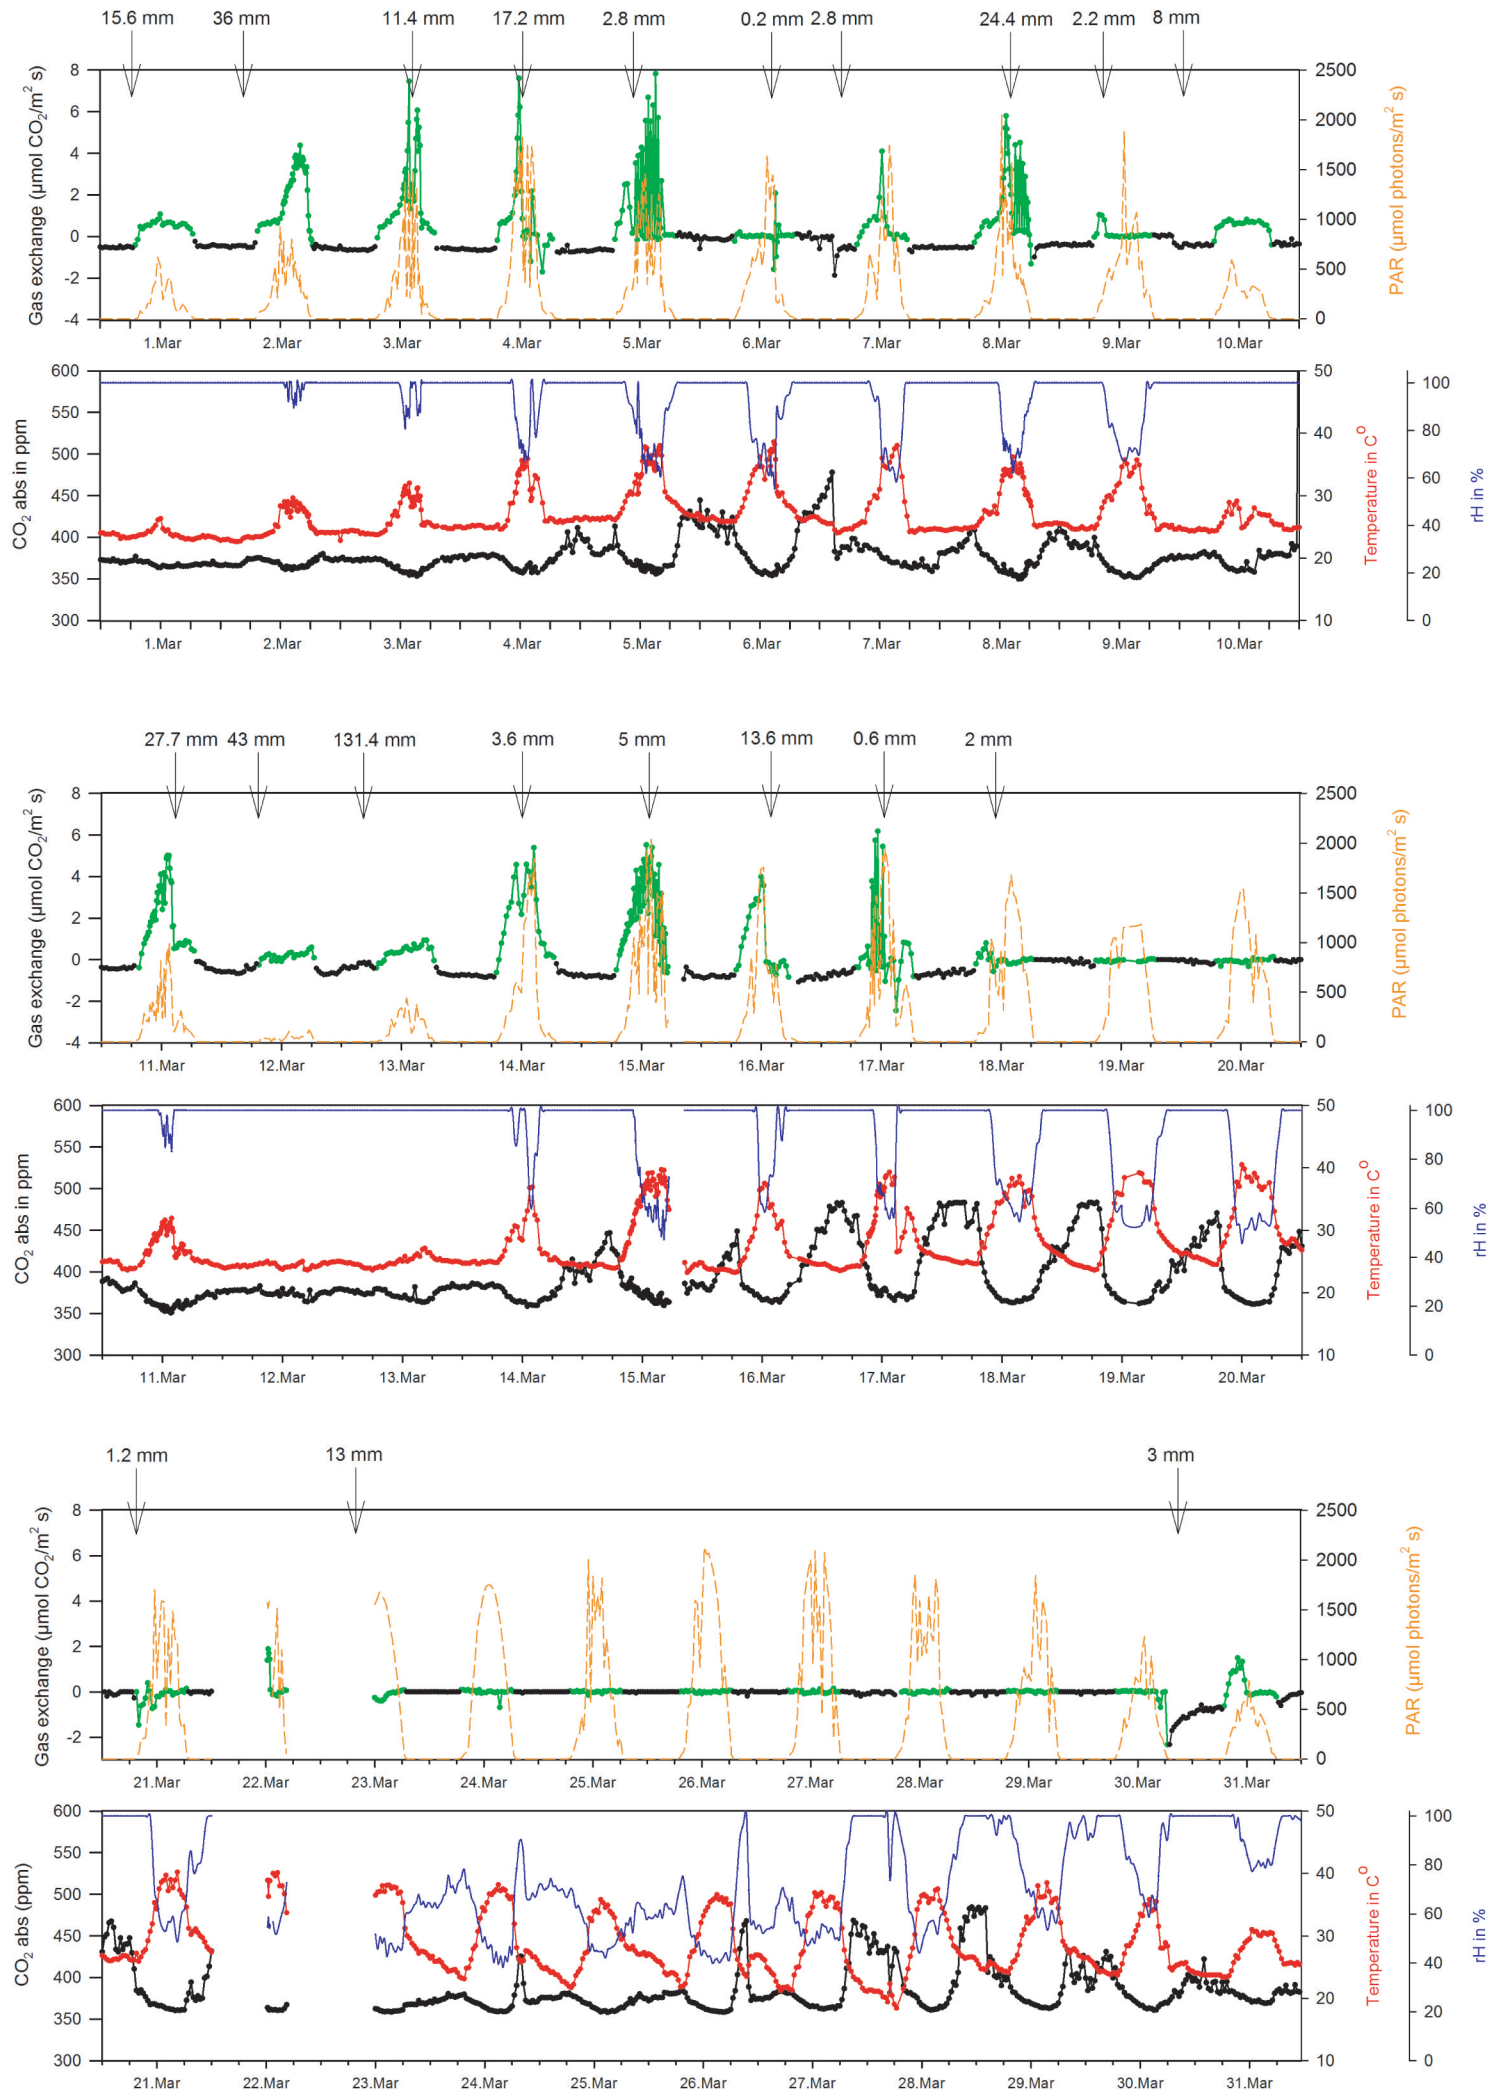

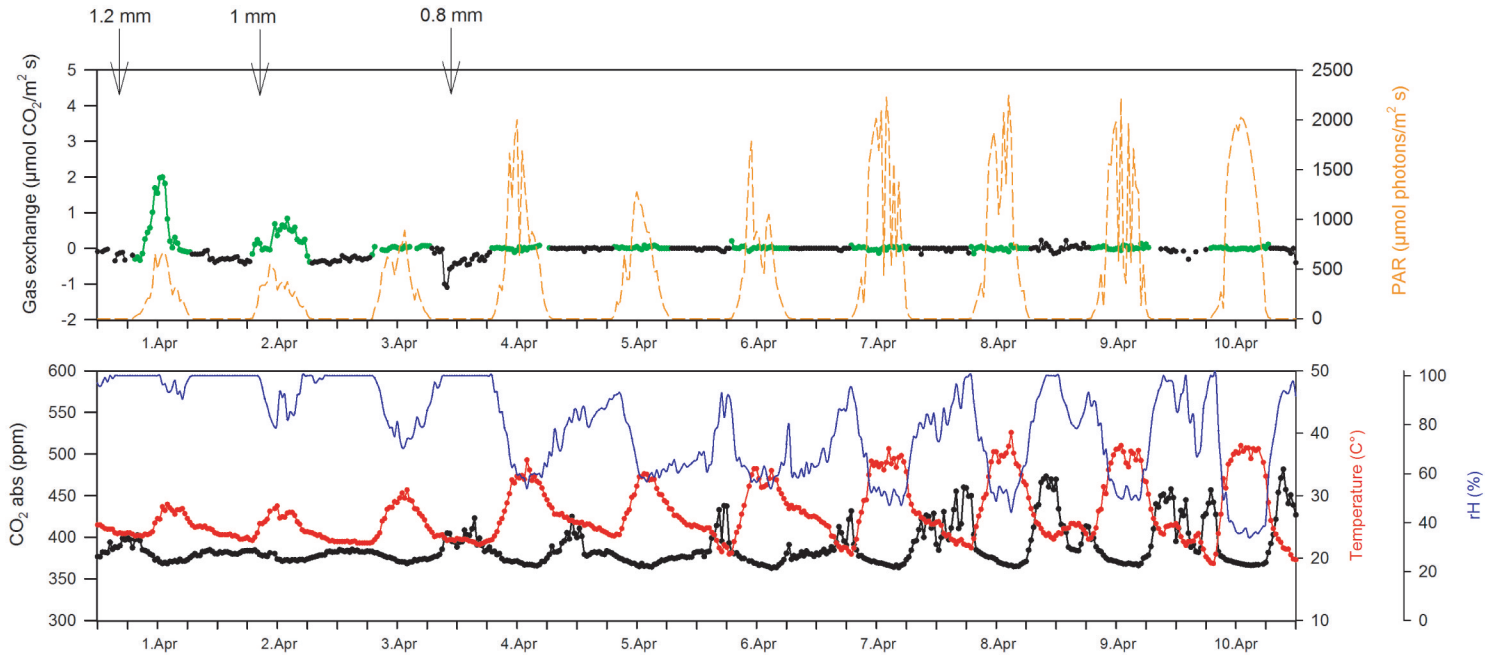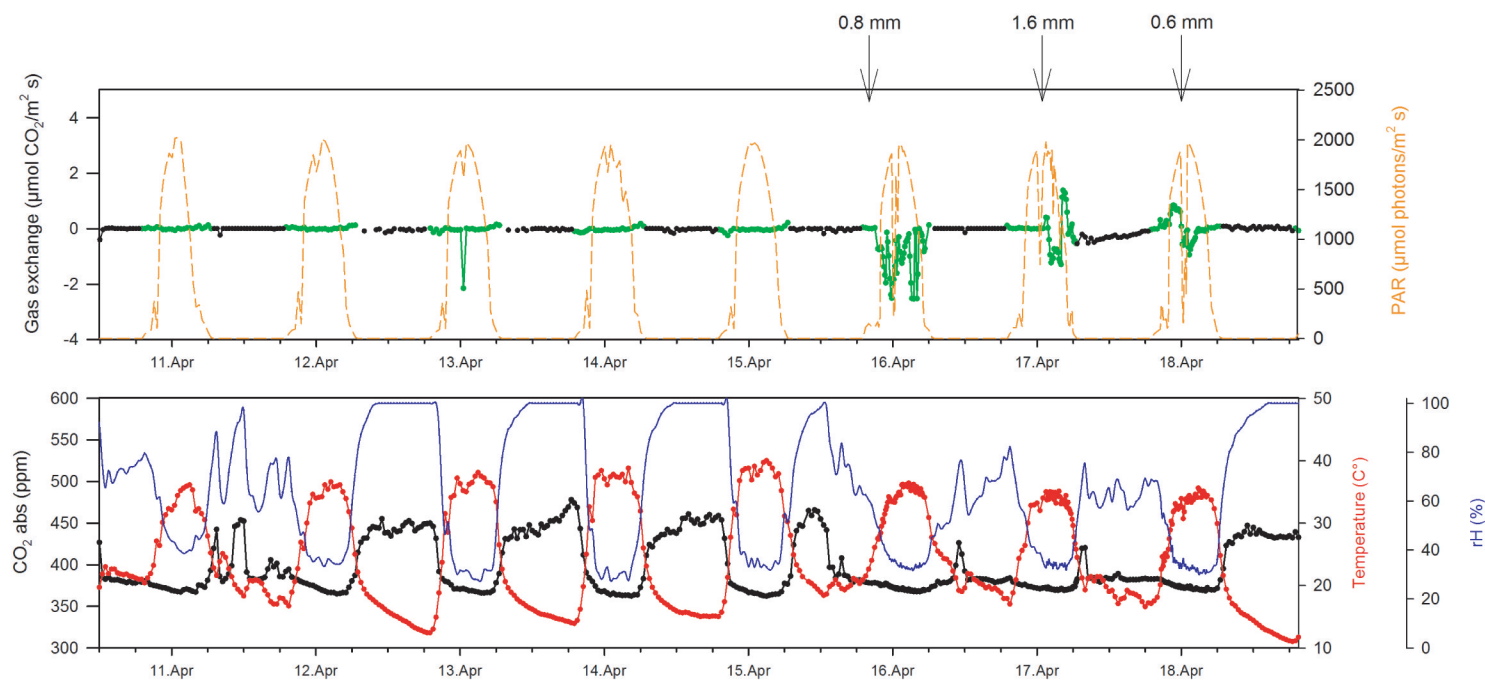

Supplement: Supplementary file 1 [file bg-2017-374-supplement.pdf]
